# Supplementary material for: Anionic ancillary ligands in cyclometalated Ru(ii) complex sensitizers improve photovoltaic efficiency of dye-sensitized solar cells: insights from theoretical investigations
Source: Royal Society of Chemistry journal article supplement (doi:10.1039/c7ta03360e), 2017-01-01
Supplement: c7ta03360e1.pdf [file c7ta03360e1.pdf]

## Supporting Information

*for*

Anionic Ancillary Ligands in Cyclometalated Ru(II) Complexes Sensitizers  
Improves the Photovoltaic Efficiency of Dye-sensitized Solar Cells :  
Insights from Theoretical Investigations

Teng-Fei Lu, Wei Li\*, Fu-Quan Bai, Ran Jia, Jie Chen\*, Hong-Xing Zhang\*

*Laboratory of Theoretical and Computational Chemistry, Institute of Theoretical  
Chemistry, Jilin University, Changchun, 130023, People's Republic of China*

**Figure S1** Calculated absorption spectra for dyes BTP using different function dissolved in DMF solution.

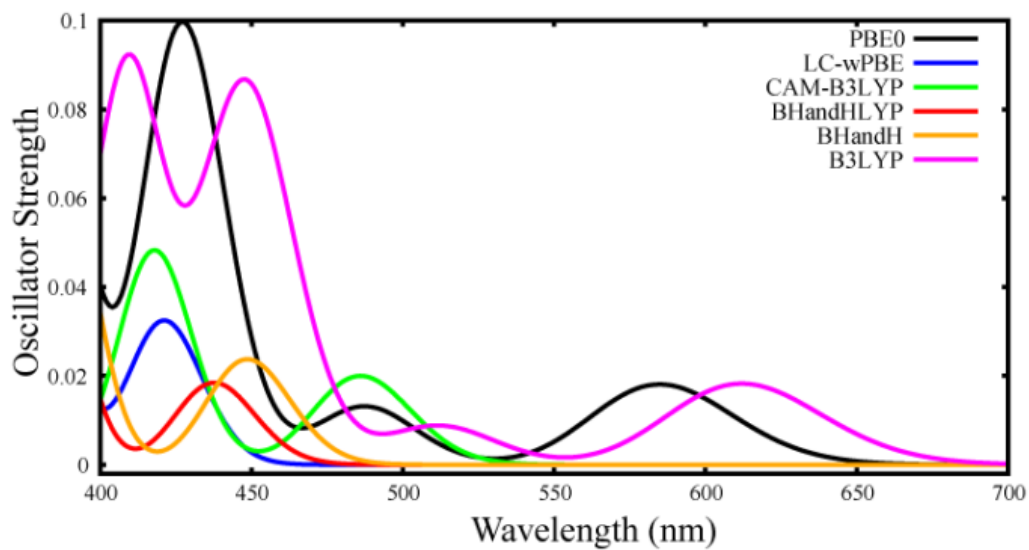

**Figure S2.** The optimized geometries of adsorption systems.

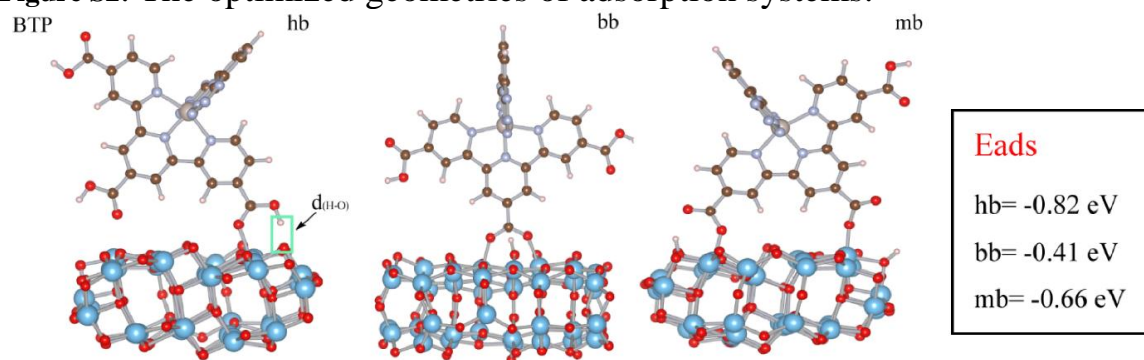

**Table S1** The optimized main geometry parameters for BTP, BATP and BMTP in ground state, at B3LYP/LanL2DZ level of theory, in comparison with available experimental value of BMTP (Bond in Å ; Angle in deg.)

|                    | <b>BPT</b> | <b>BATP</b> | <b>BMTP<sup>Expt</sup></b> | <b>BMTP</b> |
|--------------------|------------|-------------|----------------------------|-------------|
| <b>Ru N19</b>      | 1.97       | 2.00        | 1.96                       | 2.016       |
| <b>Ru1 N1</b>      | 2.08       | 2.07        | 2.03                       | 2.070       |
| <b>Ru1 N7</b>      | 2.10       | 2.06        | 2.05                       | 2.126       |
| <b>Ru1 N13</b>     | 2.10       | 2.14        | 2.06                       | 2.095       |
| <b>Ru1 N25</b>     | 2.09       | 2.11        | 2.07                       | 2.131       |
| <b>Ru1 N31</b>     | 2.09       | 2.11        | 2.07                       | 2.132       |
| <b>N19 Ru1 N1</b>  | 179.80     | 178.76      | 176.55                     | 178.38      |
| <b>N19 Ru1 N7</b>  | 103.20     | 100.80      | 102.68                     | 104.19      |
| <b>N1 Ru1 N7</b>   | 76.79      | 77.96       | 78.35                      | 77.41       |
| <b>N19 Ru1 N13</b> | 103.20     | 105.23      | 101.37                     | 101.49      |
| <b>N1 Ru1 N13</b>  | 76.79      | 75.99       | 77.56                      | 76.88       |
| <b>N7 Ru1 N13</b>  | 153.58     | 153.96      | 155.92                     | 154.30      |
| <b>N19 Ru1 N25</b> | 79.10      | 78.67       | 79.58                      | 78.33       |
| <b>N1 Ru1 N25</b>  | 101.08     | 101.32      | 97.14                      | 101.71      |
| <b>N7 Ru1 N25</b>  | 92.48      | 91.16       | 91.52                      | 92.83       |
| <b>N13 Ru1 N25</b> | 92.48      | 93.86       | 91.54                      | 92.24       |
| <b>N19 Ru1 N31</b> | 79.18      | 78.77       | 79.48                      | 78.54       |
| <b>N1 Ru1 N31</b>  | 100.62     | 101.17      | 103.83                     | 101.39      |
| <b>N7 Ru1 N31</b>  | 92.44      | 91.05       | 91.62                      | 92.69       |
| <b>N13 Ru1 N31</b> | 92.44      | 93.98       | 94.01                      | 92.42       |
| <b>N25 Ru1 N31</b> | 158.29     | 157.35      | 159.00                     | 156.88      |
